# Supplementary material
Source: MDPI journal article supplement (https://www.mdpi.com/2313-0105/9/12/588)
Supplement: s1 [file s1]

# Ionic Liquid-Laden Zn-MOF-74-Based Solid-State Electrolyte for Sodium Batteries

Alexander Mirandona-Olaeta <sup>1,2</sup>, Eider Goikolea <sup>2</sup>, Senentxu Lanceros-Mendez <sup>1,3</sup>,  
Arkaitz Fidalgo-Marijuan <sup>1,2,\*</sup> and Idoia Ruiz de Larramendi <sup>2,\*</sup>

<sup>1</sup> BCMaterials, Basque Center for Materials, Applications and Nanostructures, Bld. Martina Casiano, 3rd. Floor, UPV/EHU Science Park, 48940 Leioa, Spain

<sup>2</sup> Department of Organic and Inorganic Chemistry, Universidad del País Vasco (UPV/EHU), Barrio Sarriena s/n, 48940 Leioa, Spain

<sup>3</sup> IKERBASQUE, Basque Foundation for Science, 48009 Bilbao, Spain

\* Correspondence: arkaitz.fidalgo@bcmaterials.net (A.F.-M.); idoia.ruizdelarramendi@ehu.eus (I.R.d.L.)

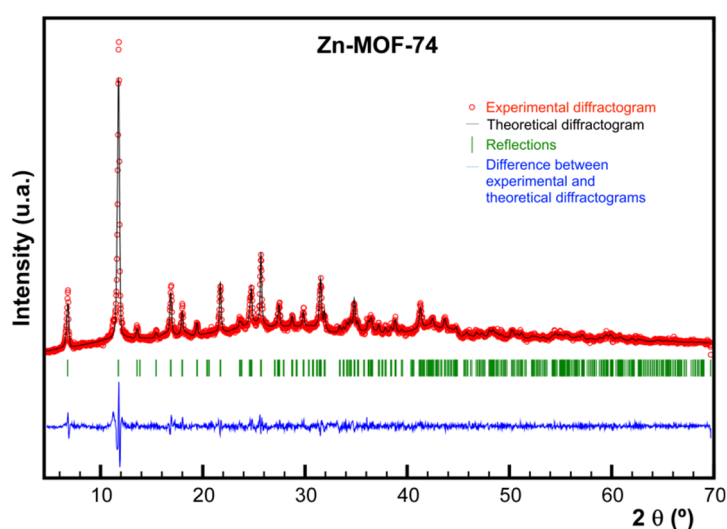

Figure S1. Observed, calculated and difference X-ray powder diffraction patterns for Zn-MOF-74.

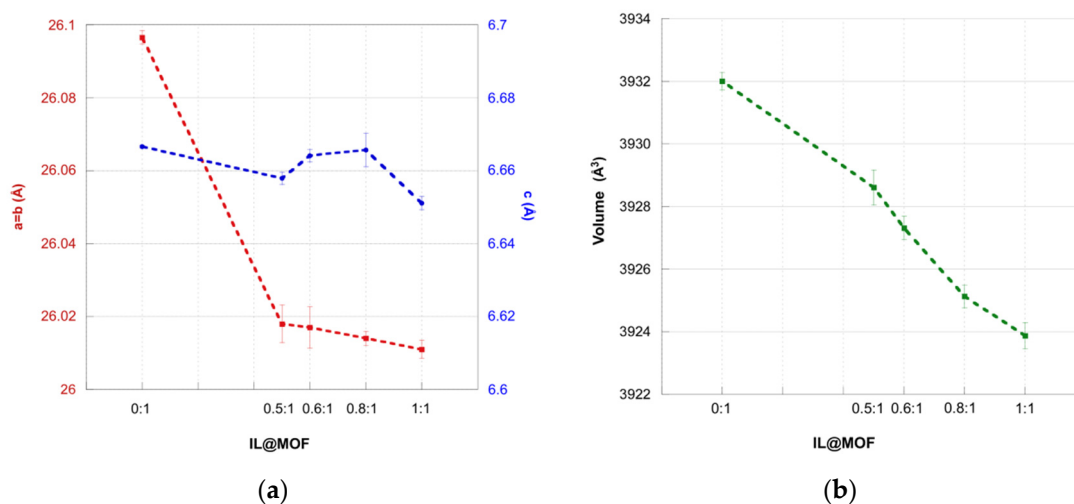

Figure S2. (a) Variation of cell parameters as a function of the amount of ionic liquid inserted, (b) Variation of the volume as a function of the quantity of IL inserted.

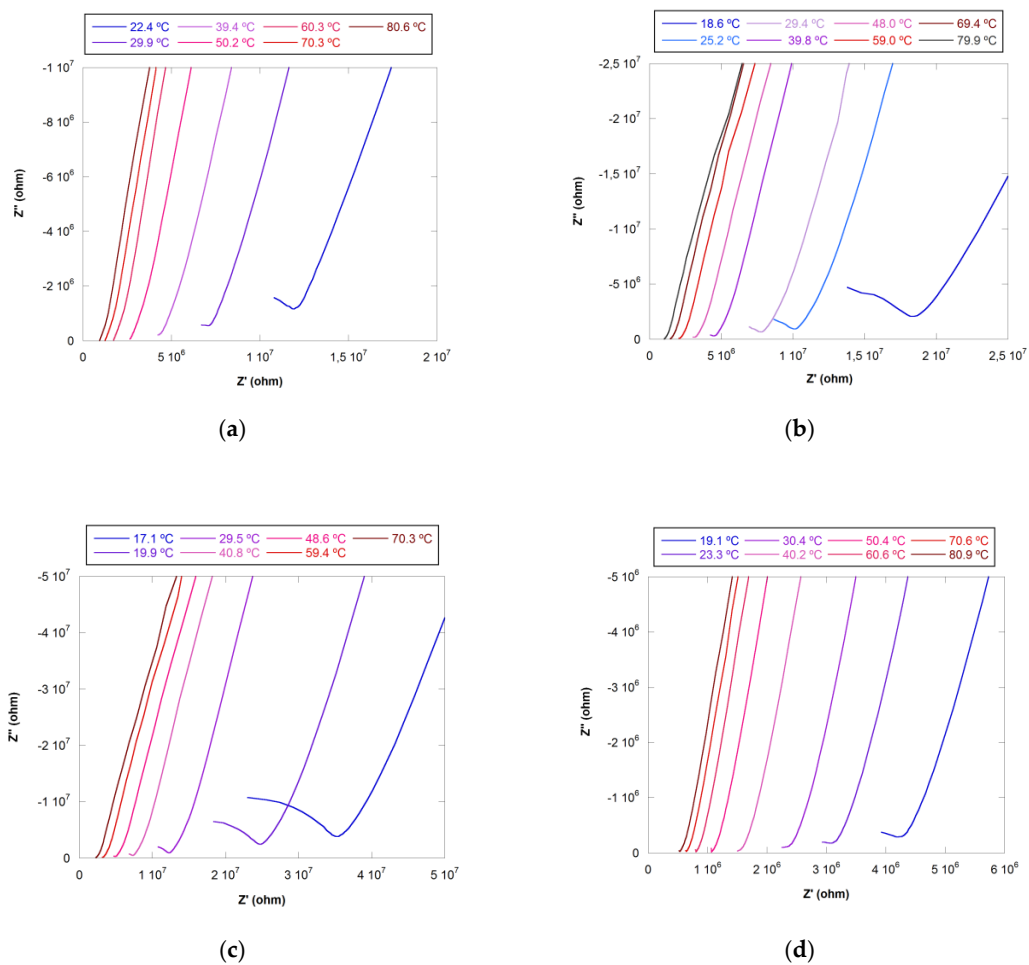

**Figure S3.** EIS spectra of different samples: (a) IL@MOF, (b) IL<sub>0.8</sub>@MOF, (c) IL<sub>0.6</sub>@MOF, (d) IL<sub>0.5</sub>@MOF.

**Table S1.** Parameters corresponding to the decomposition stages for each sample.

|             | MOF | IL@MOF | IL <sub>0.8</sub> @MOF | IL <sub>0.6</sub> @MOF | IL <sub>0.5</sub> @MOF |
|-------------|-----|--------|------------------------|------------------------|------------------------|
| Water %     | 10  | 13     | 17                     | 18                     | 19                     |
| Zn-MOF-74 % | 44  | 54     | 48                     | 47                     | 46                     |

**Table S2.** Decomposition temperature range of Zn-MOF-74.

|                     | MOF | IL@MOF | IL <sub>0.8</sub> @MOF | IL <sub>0.6</sub> @MOF | IL <sub>0.5</sub> @MOF |
|---------------------|-----|--------|------------------------|------------------------|------------------------|
| T <sub>1</sub> (°C) | 275 | 300    | 295                    | 290                    | 285                    |
| T <sub>2</sub> (°C) | 380 | 435    | 440                    | 450                    | 445                    |

**Table S3.** Adsorption fitting parameters of Zn-MOF-74 and IL<sub>0.5</sub>@MOF.

|                        | S <sub>BET</sub><br>(m <sup>2</sup> ·g <sup>-1</sup> ) | ΔP/ΔP <sub>0</sub> | R <sup>2</sup> | S <sub>micro</sub><br>(m <sup>2</sup> ·g <sup>-1</sup> ) | S <sub>ext</sub><br>(m <sup>2</sup> ·g <sup>-1</sup> ) | V <sub>micro</sub><br>(cm <sup>3</sup> ·g <sup>-1</sup> ) | V <sub>T</sub><br>(cm <sup>3</sup> ·g <sup>-1</sup> ) |
|------------------------|--------------------------------------------------------|--------------------|----------------|----------------------------------------------------------|--------------------------------------------------------|-----------------------------------------------------------|-------------------------------------------------------|
| Zn-MOF-74              | 1123                                                   | 0.007-0.06         | 0.9992         | 1045                                                     | 77                                                     | 0.384                                                     | 0.469                                                 |
| IL <sub>0.5</sub> @MOF | 62                                                     | 0.068-0.23         | 0.991          | 0                                                        | 62                                                     | 0                                                         | 0,126                                                 |
